# Supplementary material
Source: MDPI journal article supplement (https://www.mdpi.com/2304-6740/11/12/450)
Supplement: s1 [file s1]

## **Supplementary Materials**

### **Probing the reactivity of [4Fe-4S] FNR with O<sub>2</sub> and NO: increased O<sub>2</sub> resistance and relative specificity for NO of the [4Fe-4S] L28H FNR cluster**

Jason C. Crack, Patricia Amara, Eve de Rosny, Claudine Darnault, Melanie R. Stapleton, Jeffrey Green, Anne Volbeda, Juan C. Fontecilla-Camps and Nick E. Le Brun

## Supplementary Figures

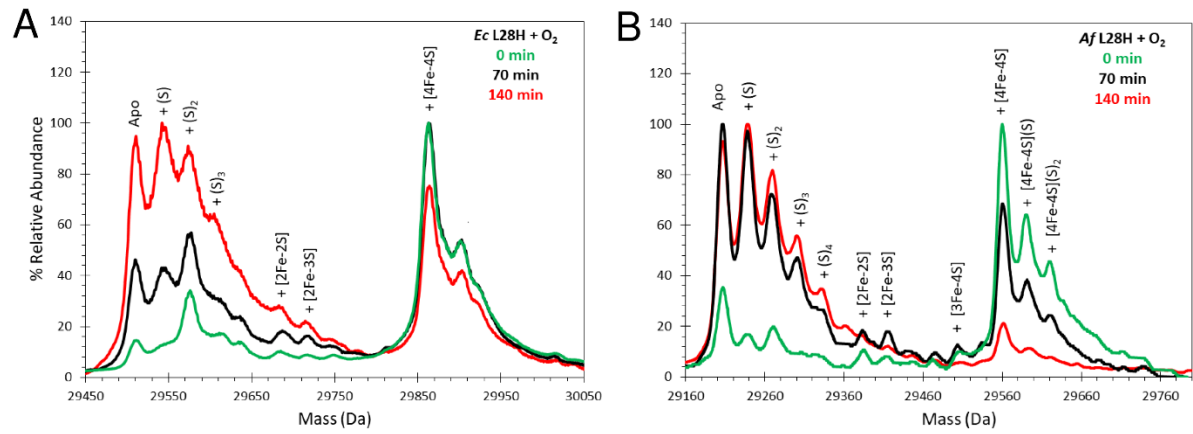

**Figure S1. Reaction of L28H-EcFNR and L28H-A/FNR with O<sub>2</sub> monitored by native MS.** Deconvoluted mass spectrum of (A) L28H-EcFNR and (B) L28H-A/FNR before (green line) and after (70 min, black line; 140 min, red line) exposure to O<sub>2</sub>. Persulfide adducts of the apo proteins are the major products observed.

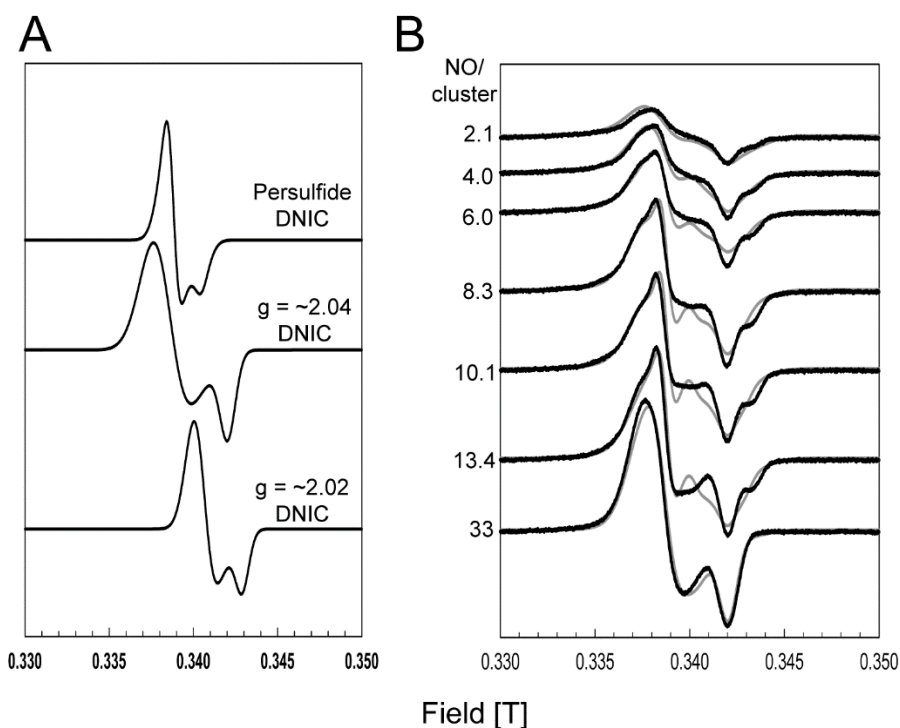

**Figure S2. Deconvolution of EPR spectra resulting from nitrosylation of [4Fe-4S] L28H-EcFNR.** (A), Simulated EPR spectra of persulfide-ligated DNIC ( $g_{\perp} = 2.044$ ,  $g_{\parallel} = 2.032$ ) [50,60], and two thiol-coordinated DNICs at  $g \approx 2.04$  ( $g_{\perp} = 2.045$ ,  $g_{\parallel} = 2.023$ ) [61,62], and  $g \approx 2.02$  ( $g_{\perp} = 2.023$ ,  $g_{\parallel} = 2.016$ ) [28,63] that were used to deconvolute the recorded (74 K) EPR spectra in (B). (B), EPR spectra for nitrosylated L28H-EcFNR (data, black lines), together with simulations of the experimental data ( $R^2 \approx 0.90$ ) (gray lines) obtained by the combination of varying amounts of the spectra shown in A.

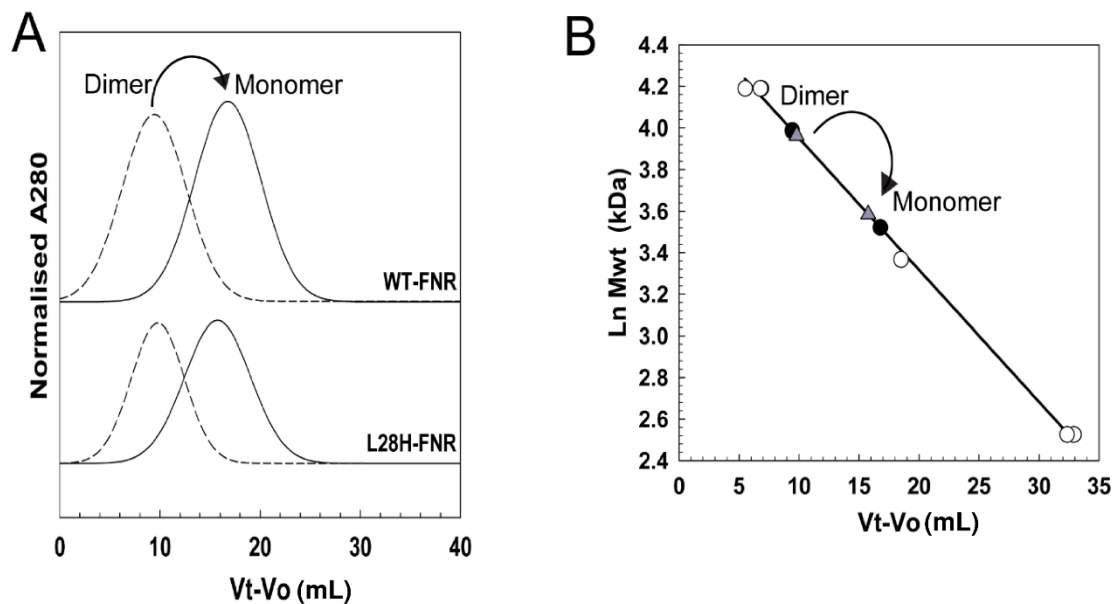

**Figure S3. Gel filtration of [4Fe-4S]- L28H-EcFNR before and after nitrosylation.** (A) Chromatogram for L28H-EcFNR pre- (dashed line) and post-NO exposure (solid black line). (B) Standard calibration curve for Sephacryl S100HR column. White circles correspond to standard proteins (BSA, carbonic anhydrase, cytochrome *c*). Grey triangles correspond to L28H-EcFNR (pre-NO, 53 kDa; post-NO, 37 kDa), respectively. Black circles correspond to wt-EcFNR (see [24] for further details). The data indicate that nitrosylation of [4Fe-4S]-L28H-EcFNR results in an iron-nitrosyl bound FNR monomer.  $V_o$  is the void volume of the column;  $V_t$  is the total elution volume, including void volume.

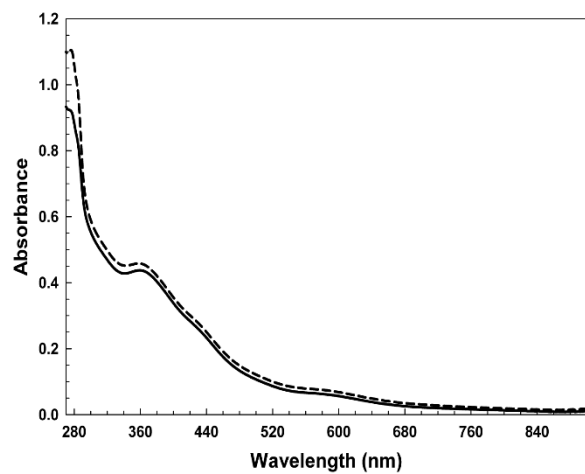

**Figure S4. UV-visible properties of nitrosylated [4Fe-4S] L28H-EcFNR.** Absorbance spectrum of nitrosylated L28H-EcFNR (dashed black line) after rapid gel filtration (PD10, Cytiva). The samples contained ~1.4 (54  $\mu$ M) RRE per protein, based on a  $\epsilon_{362 \text{ nm}}$  value of 8530  $\text{M}^{-1} \text{cm}^{-1}$  [61]. The L28H sample corresponds to sample 3 in Table 1. The previously published [24] spectrum of nitrosylated wt FNR (solid black line) is shown for comparison.

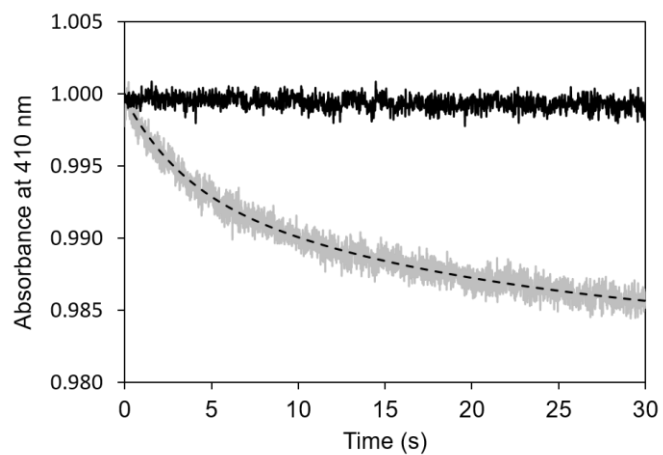

**Figure S5. Reaction of [4Fe-4S]-A/FNR with O<sub>2</sub>.** Stopped-flow measurements for the wild-type (gray) and the L28H-FNR variant (black). Curves are translated to Abs<sub>410 nm</sub>=1 at time 0. The dashed line represents the fit of the wild-type curve to a two-phase exponential decay equation.

## Supplementary Tables

**Table S1.** X-ray data collection and refinement statistics for [4Fe-4S] L28H-A/FNR.

| X-ray data                   |                     | Refinement                              |             |
|------------------------------|---------------------|-----------------------------------------|-------------|
| Space group                  | I422                | Resolution (Å)                          | 47.77-2.40  |
| Cell dimensions              |                     | Reflections (work / free)               | 12080 / 568 |
| a=b, c (Å)                   | 75.20 217.47        | R <sub>work</sub> / R <sub>free</sub>   | 19.8 / 22.2 |
| α=β=γ (°)                    | 90                  | Number of atoms                         |             |
| Resolution (Å) <sup>a</sup>  | 47.8-2.4 (2.48-2.4) | Protein                                 | 1839        |
| R <sub>merge</sub> (%)       | 7.1 (340.8)         | [4Fe-4S] cluster                        | 8           |
| mean(I/σ(I))                 | 18.6 (0.7)          | Solvent (MPD and water)                 | 115         |
| CC(1/2)                      | 1.000 (0.449)       | Average B factors (Å <sup>2</sup> )     |             |
| Total number of observations | 147841 (14671)      | Protein                                 | 88.2        |
| Total number unique          | 12709 (1205)        | [4Fe-4S] cluster                        | 91.0        |
| Completeness (%)             | 99.9 (99.7)         | Solvent                                 | 86.6        |
| Redundancy                   | 11.6 (12.2)         | R.m.s. deviations                       |             |
| Anomalous completeness (%)   | 99.8 (99.4)         | Bond lengths (Å)                        | 0.003       |
| Anomalous redundancy         | 6.2 (6.4)           | Bond angles (°)                         | 0.53        |
|                              |                     | Ramachandran plot outliers <sup>b</sup> | 0           |
|                              |                     | Rotamer outliers (%) <sup>b</sup>       | 1.5         |
|                              |                     | All atom clash score <sup>b</sup>       | 2.7         |

<sup>a</sup> Numbers within brackets denote the highest resolution shell.

<sup>b</sup> Molprobrity statistics [64].

**Table S2.** Rate constants for the nitrosylation of [4Fe-4S] L28H-*Ec*FNR with NO and comparison to wild-type FNR and Wbl proteins.

|       |      | Rate constants/ $\text{M}^{-1} \text{s}^{-1}$ <sup>a</sup> |                             |                    |                    |
|-------|------|------------------------------------------------------------|-----------------------------|--------------------|--------------------|
| Phase | Step | WT FNR                                                     | L28H FNR                    | WhiD               | WhiB1              |
| 1     | A→B  | $2.81 \pm 0.10 \times 10^5$                                | $1.33 \pm 0.02 \times 10^5$ | $6.50 \times 10^5$ | $4.40 \times 10^5$ |
| 2     | B→C  | $1.89 \pm 0.10 \times 10^4$                                | $1.59 \pm 0.07 \times 10^4$ | $2.13 \times 10^4$ | $1.38 \times 10^4$ |
| 3     | C→D  | $4.61 \pm 0.25 \times 10^3$                                | $9.51 \pm 0.49 \times 10^3$ | $5.36 \times 10^3$ | $8.34 \times 10^3$ |
| 4     | D→E  | $0.75 \pm 0.03 \times 10^3$                                | $1.29 \pm 0.09 \times 10^3$ | $1.00 \times 10^3$ | $0.90 \times 10^3$ |

<sup>a</sup> Derived from linear fits of the data at low NO concentrations in Fig. 5. Rate constants for the nitrosylation of wild type FNR, *S. coelicolor* WhiD and *M. tuberculosis* WhiB1 [24, 28], are shown for comparison.
